# Supplementary material for: Antigen receptor‐engineered Tregs inhibit CNS autoimmunity in cell therapy using nonredundant immune mechanisms in mice
Source: PubMed Central journal article supplement — Eur J Immunol. 2022 May 27;52(8):1335–49. doi: 10.1002/eji.202249845 (PMC9542066; doi:10.1002/eji.202249845), 2022-05-27
Supplement: EJI-52-1335-s002.pdf [file EJI-52-1335-s002.pdf]

## Supplementary information for

# Antigen receptor-engineered Tregs inhibit CNS autoimmunity in cell therapy using non-redundant immune mechanisms in mice

Jelka Pohar<sup>1</sup>, Richard O'Connor<sup>2</sup>, Benoît Manfroi<sup>1</sup>, Mohamed El Behi<sup>1</sup>, Luc Jouneau<sup>3</sup>, Pierre Boudinot<sup>3</sup>, Mario Bunse<sup>4</sup>, Wolfgang Uckert<sup>4</sup>, Marine Luka<sup>5,6</sup>, Mickael Ménager<sup>5,6</sup>, Roland Liblau<sup>7</sup>, Stephen M. Anderton<sup>2</sup>, and Simon Fillatreau<sup>1,8,9,\*</sup>

<sup>1</sup>Institut Necker Enfants Malades, Institut National de la Santé et de la Recherche Médicale INSERM U1151 - Centre National de la Recherche Scientifique CNRS UMR 8253, 156-160, rue de Vaugirard 75015 Paris, France

<sup>2</sup>University of Edinburgh, Edinburgh, United Kingdom

<sup>3</sup>Université Paris-Saclay, INRAE, UVSQ, VIM, 78350 Jouy-en-Josas, France

<sup>4</sup>Max Delbrück Center for Molecular Medicine in the Helmholtz Association, Berlin, Germany

<sup>5</sup>Université de Paris, Imagine Institute, Laboratory of Inflammatory Responses and Transcriptomic Networks in Diseases, Atip-Avenir Team, INSERM UMR 1163, F-75015 Paris, France.

<sup>6</sup>Labtech Single-Cell@Imagine, Imagine Institute, INSERM UMR 1163, F-75015 Paris, France.

<sup>7</sup>Infinity - Institut Toulousain des Maladies Infectieuses et Inflammatoires, NSERM UMR1291 - CNRS UMR5051 - Université Toulouse III, Toulouse, France.

<sup>8</sup>Université de Paris, Faculté de Médecine, Paris, France

<sup>9</sup>AP-HP, Hôpital Necker-Enfants Malades, Paris, France

## Supplementary information

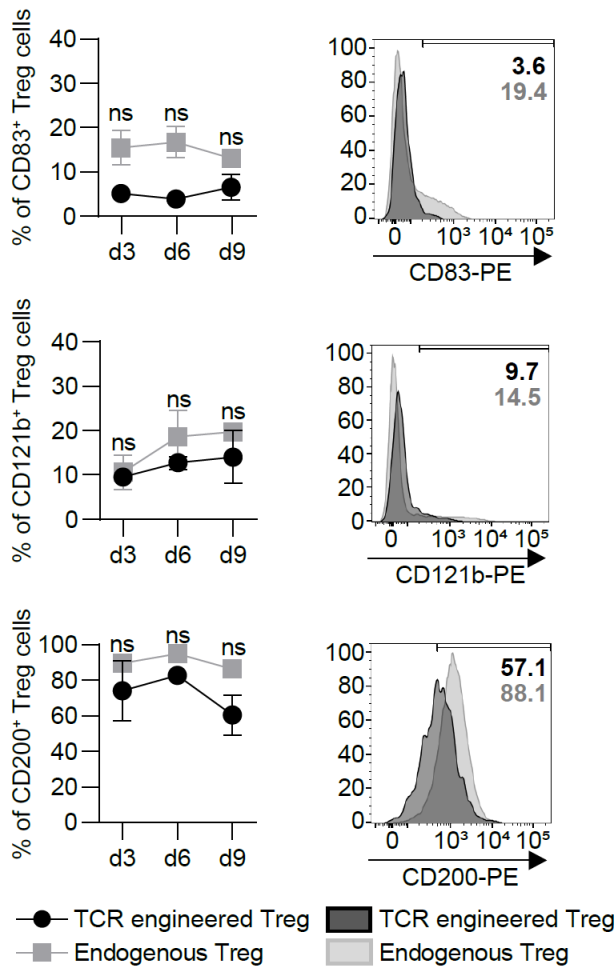

### Supplementary Figure 1 (related to Fig. 1): Surface expression of CD83, CD121b, and CD200 does not differ significantly between engineered and endogenous Tregs.

Polyclonal Tregs were isolated from C57BL/6 mice and transduced with high-avidity MOG reactive TCR.  $1 \times 10^6$  engineered Tregs were injected into C57BL/6 recipient mice one day before immunization with MOG(35-55). On days 3, 6 and 9 p.i. cells from draining LN (inguinal and popliteal) were harvested and stained for CD83, CD121b (IL-1R2), and CD200 surface markers to determine their expression on the cell surface of endogenous and engineered MOG-reactive Tregs.

In each experiment, three mice were sacrificed on the selected days and cells from all LN were pooled. Data are pooled from two experiments. Black circles correspond to engineered Tregs, and grey squares to endogenous Tregs. Graphs show mean  $\pm$  SEM. Representative flow cytometry plots show

the percentage of cells with high expression of selected surface markers on day 3. Dark histograms correspond to TCR-engineered Tregs and light grey one's to endogenous Tregs.

ns – not significant.

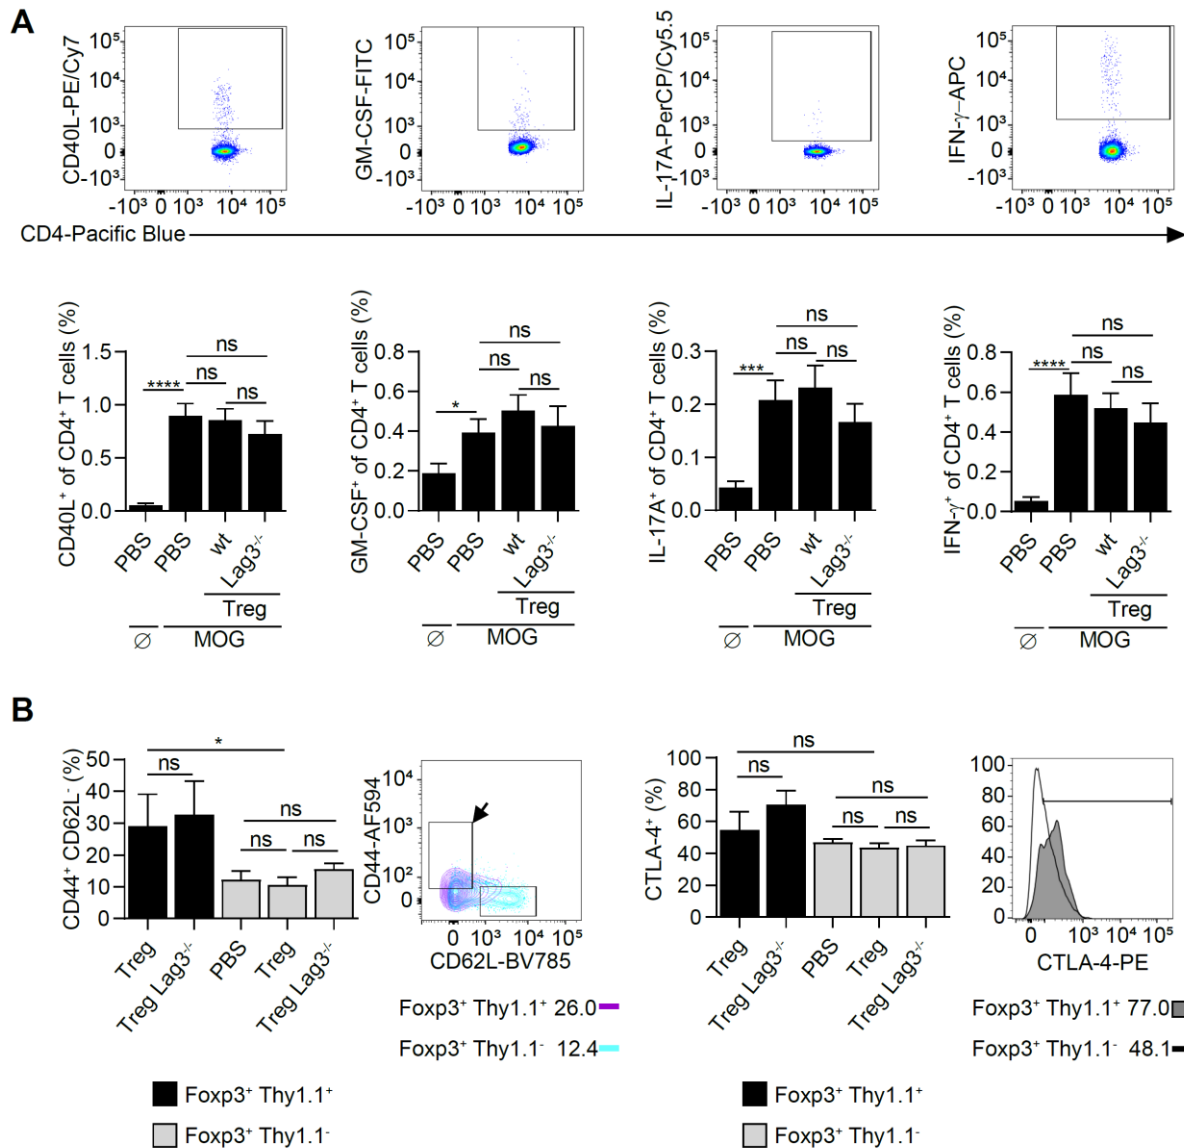

**Supplementary Figure 2, related to Fig. 2: LAG-3 contributes to the protective function of engineered MOG-reactive Tregs.**

Engineered Tregs were prepared from WT or *Lag3*-deficient mice and transduced with MOG-reactive TCR of high avidity.  $2 \times 10^5$  engineered Tregs were adoptively transferred into C57BL/6 mice on day -1. Control groups were treated only with PBS. On day 0, mice were immunized with MOG(35-55) to induce EAE. At the end of the experiment (day 35 p.i.), mice were sacrificed and spleens collected. Data show mean + SEM and are a compilation of 3 independent experiments (n=14-17 per group).

**(A)** Splenocytes were left untreated ( $\emptyset$ ) or stimulated with MOG(35-55) for 6 hours. The expression of immune molecules (CD40L, GM-CSF, IL-17A, and IFN- $\gamma$ ) was analyzed by intracellular cytokine staining. Representative flow cytometry plots showing the expression of immune molecules in CD4<sup>+</sup> T cells (top).

**(B)** Splenocytes were stained for CD44, CD62L and CTLA-4. Percentage of CD44<sup>+</sup>CD62L<sup>-</sup> and CTLA-4<sup>+</sup> cells was compared between engineered (Foxp3<sup>+</sup>Thy1.1<sup>+</sup>) and endogenous (Foxp3<sup>+</sup>Thy1.1<sup>-</sup>) Tregs. Representative flow cytometry plot shows the expression of CD44, CD62L and CTLA-4 by engineered (Foxp3<sup>+</sup>Thy1.1<sup>+</sup>, magenta) and endogenous (Foxp3<sup>+</sup>Thy1.1<sup>-</sup>, cyan) Tregs. The arrow indicates “activated” CD44<sup>hi</sup>CD62L<sup>lo</sup> cells.

\*\*\*\*p<0.0001, \*\*\*p<0.001, \*\*p<0.01, \*p<0.05, ns – not significant.

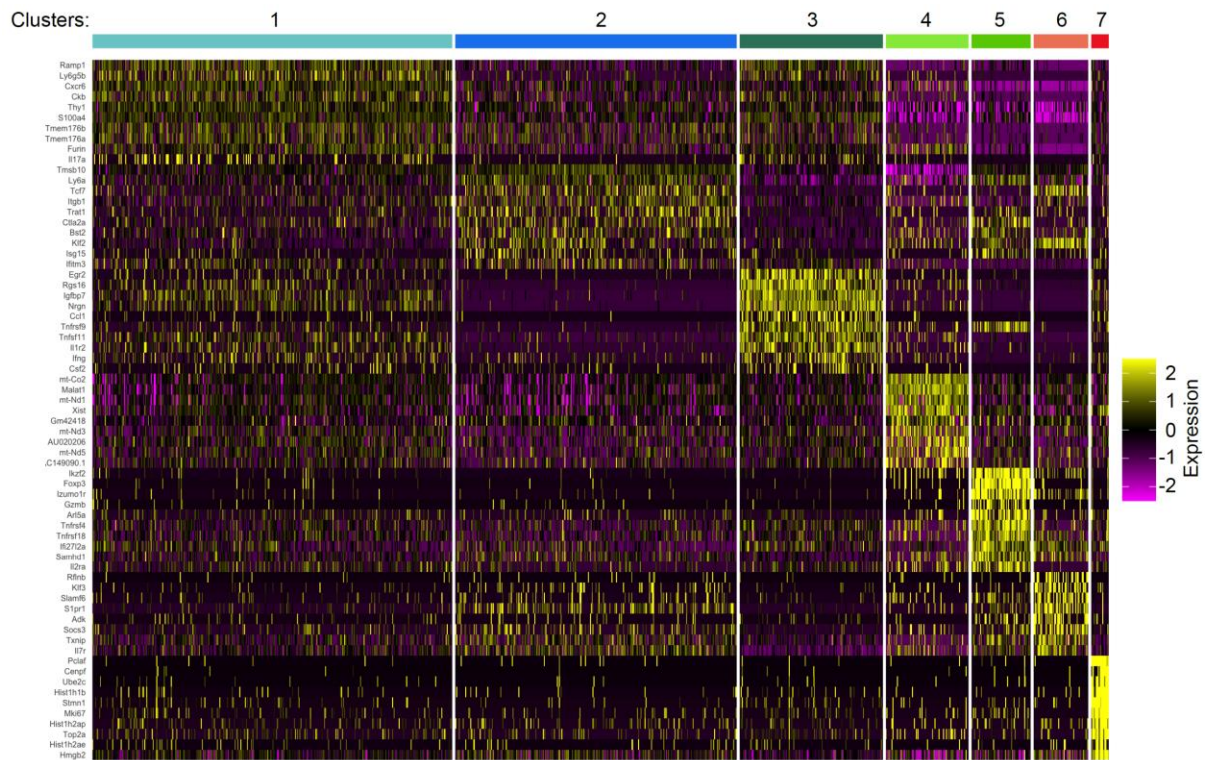

**Supplementary Figure 3, related to Fig. 3: Transcriptome characteristics of CNS Tregs**

CD45<sup>+</sup> cells were sorted from the CNS of C57BL/6 mice at the peak of EAE (day 19) and analyzed by single-cell RNAseq (10x Genomics). CNS-infiltrating CD4<sup>+</sup> T cells were grouped into 7 clusters (defined in Figure 3). A heatmap of the expression of the most characteristic differentially expressed genes belonging to the different clusters is shown.

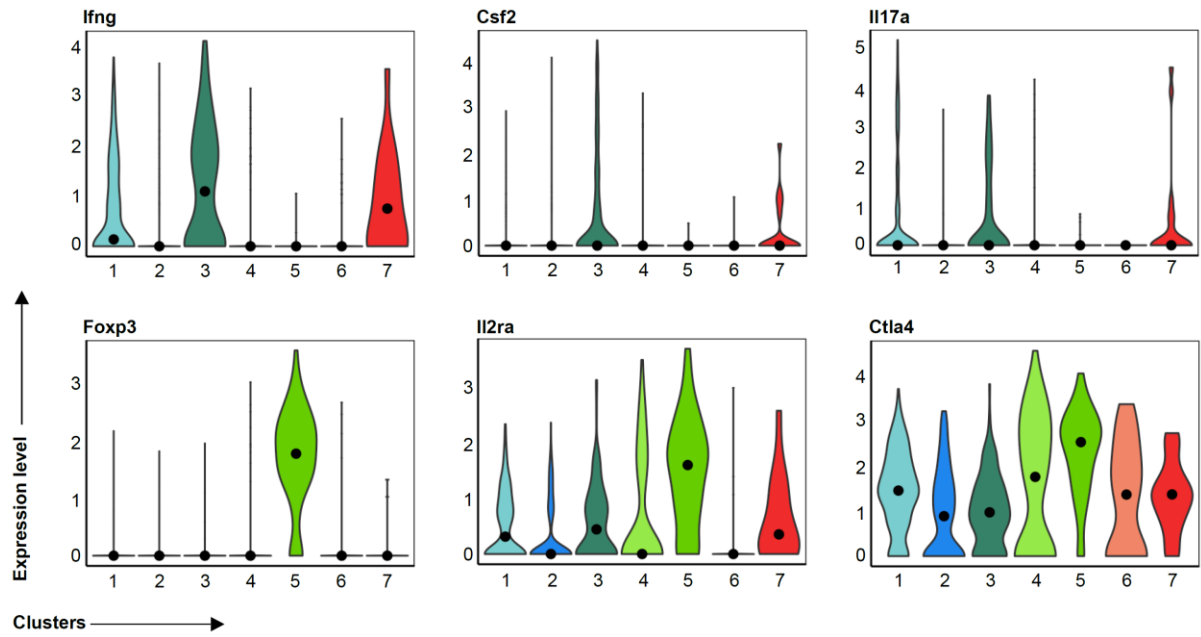

**Supplementary Figure 4, related to Fig. 3: Transcriptome characteristics of CNS Tregs**

CD45<sup>+</sup> cells were sorted from the CNS of C57BL/6 mice at the peak of EAE (day 19) and analyzed by single-cell RNAseq (10x Genomics). CNS-infiltrating CD4<sup>+</sup> T cells were grouped into 7 clusters (defined in Figure 3). Violin plots show normalized expression of selected markers (*Ifng*, *Csf2*, *Il17a*, *Foxp3*, *Il2ra*, *Ctla4*) in each cluster.

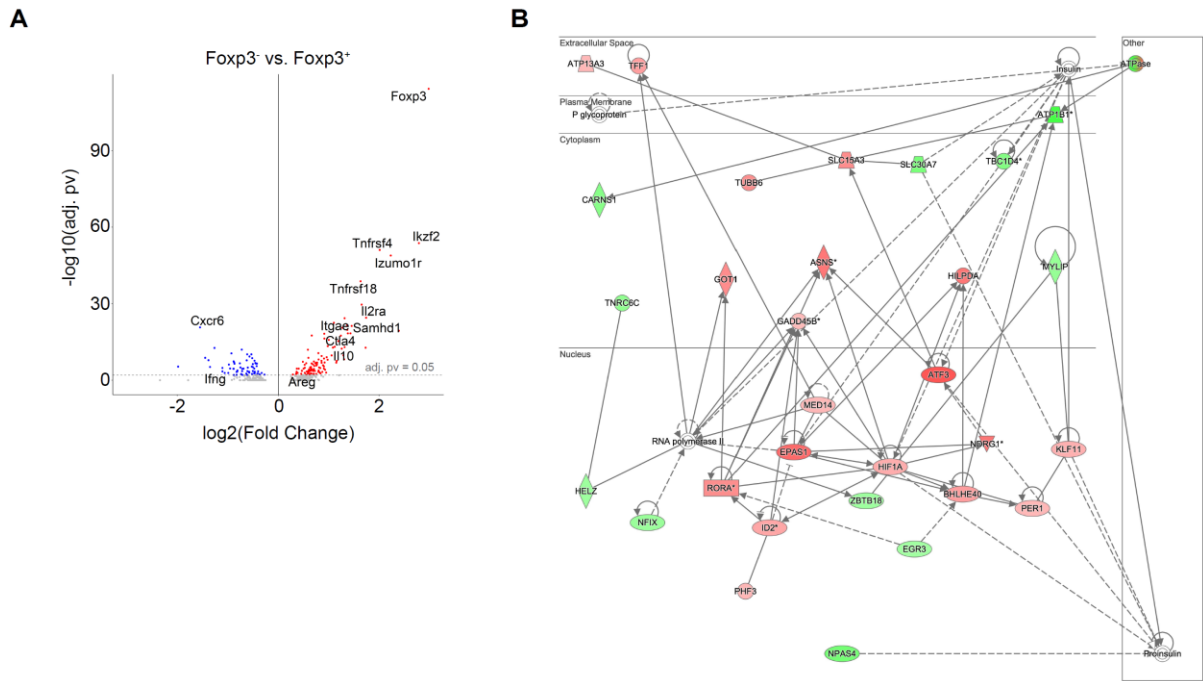

**Supplementary Figure 5, related to Fig. 3: Transcriptome characteristics of CNS Tregs**

**(A)** CD45<sup>+</sup> cells were sorted from the CNS of C57BL/6 mice at the peak of EAE (day 19) and analyzed by single cell RNAseq (10X Genomics). Volcano plot showing differentially expressed genes between Foxp3<sup>-</sup> (blue) and Foxp3<sup>+</sup> (red) cells.

**(B)** Tregs and Tconvs were sorted from CNS and spleen of Foxp3.eGFP mice at the peak of EAE according to the expression of CD4 and Foxp3 (Treg: CD4<sup>+</sup>Foxp3.eGFP<sup>+</sup> cells; Tconv: CD4<sup>+</sup>Foxp3.GFP<sup>-</sup> cells). Samples were hybridized to Affymetrix 430 2.0 whole-genome mouse arrays. Data show a selected Ingenuity network of differentially expressed transcriptional regulators between spleen and CNS Tregs (genes expressed at higher level in CNS or spleen Tregs are shown in red or green, respectively). The brightness of color relates to the fold change of differentially expressed gene (darker color reflects higher fold change).

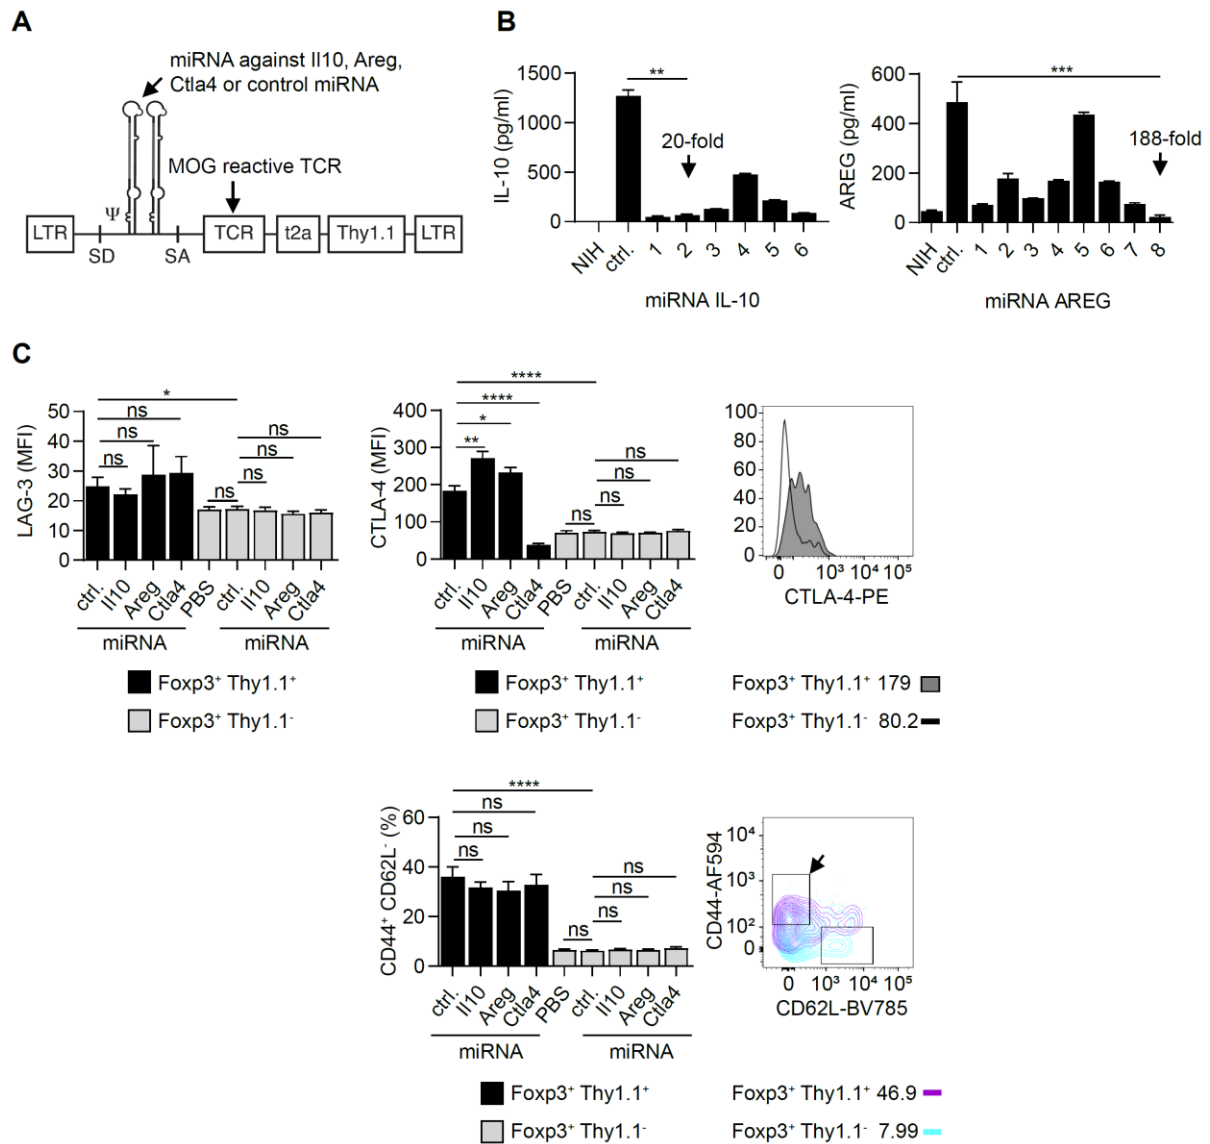

**Supplementary Figure 6, related to Fig. 4: IL-10 is critically involved in the protective function of autoreactive Tregs**

**(A)** Design of retroviral vector coding for high avidity TCR against MOG peptide and one (*Il10*, *Areg*) or two (*Ctla4*, ctrl.) intronic miRNA sequences (adopted from Kieback et al., 2016).

**(B)** NIH/3T3 cells were left untouched (NIH) or co-transduced with retroviral particles to express mouse *Il10* or *Areg*, and additionally retroviral particles containing the MOG-reactive TCR with the addition of miRNA against *Il10*, *Areg*, and control miRNA (ctrl.). 6 and 8 miRNA were tested for *Il10* and *Areg*, respectively. Supernatants were harvested 72h later to measure IL-10 and AREG concentrations in supernatants by Bioplex or ELISA, respectively. Arrows indicate the miRNA sequences later used in experiments and the fold inhibition of expression. Data show mean + SEM of one out of 2 experiments. Two (IL-10) or three (AREG) technical repetitions were made for each condition in each experiment.



**(C)**  $2 \times 10^5$  Tregs engineered to express MOG-reactive TCR and either control miRNA, miRNA to silence *Il10*, *Areg*, or *Ctla4* expression were adoptively transferred into C57BL/6 recipient mice on day -1. Control groups were treated with PBS. On day 0, mice were immunized with MOG(35-55) to induce EAE. Peripheral blood was collected 9 days p.i. and cells were stained for LAG-3, CTLA-4 (intracellularly) and CD44 as well as CD62L (cell surface). Expression of LAG-3 (MFI), CTLA-4 (MFI) and percentages of CD44<sup>+</sup>CD62L<sup>-</sup> cells were compared between engineered Tregs (Foxp3<sup>+</sup>Thy1.1<sup>+</sup>) and endogenous Tregs (Foxp3<sup>+</sup>Thy1.1<sup>-</sup>). Representative flow cytometry plots show the expression of selected markers.

Data are pooled from four experiments (n = 22 per group). Graphs show mean + SEM.

\*\*\*\*p<0.0001, \*\*\*p<0.001, \*\*p<0.01, \*p<0.05, ns – not significant

**A Lymph nodes - 3 days p.i.**

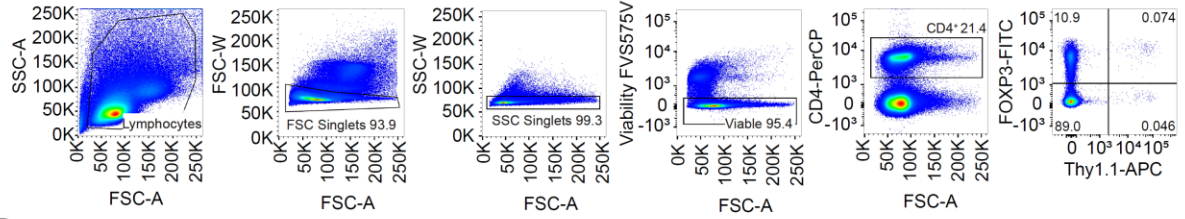

**B Blood - 9 days p.i.**

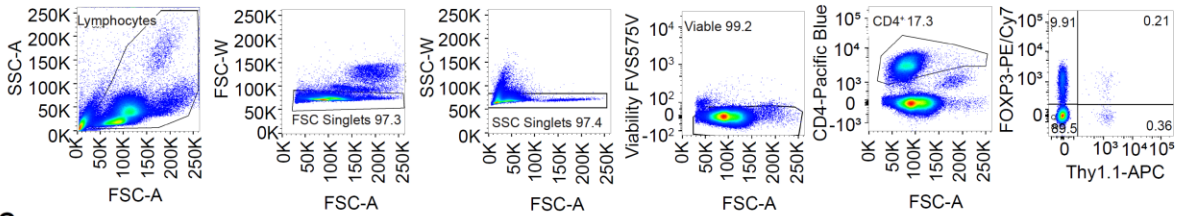

**C Spleen - 35 days p.i.**

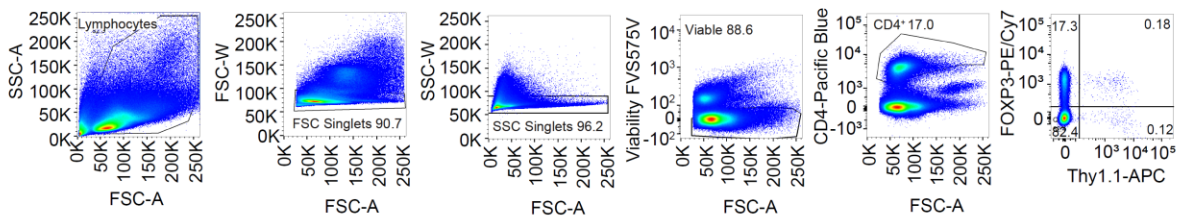

**D Blood - 9 days p.i.**

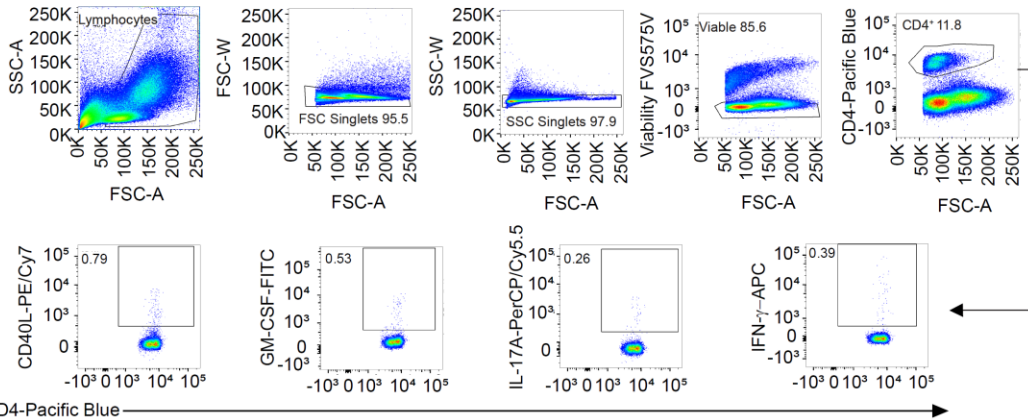

**E Spleen - 35 days p.i.**

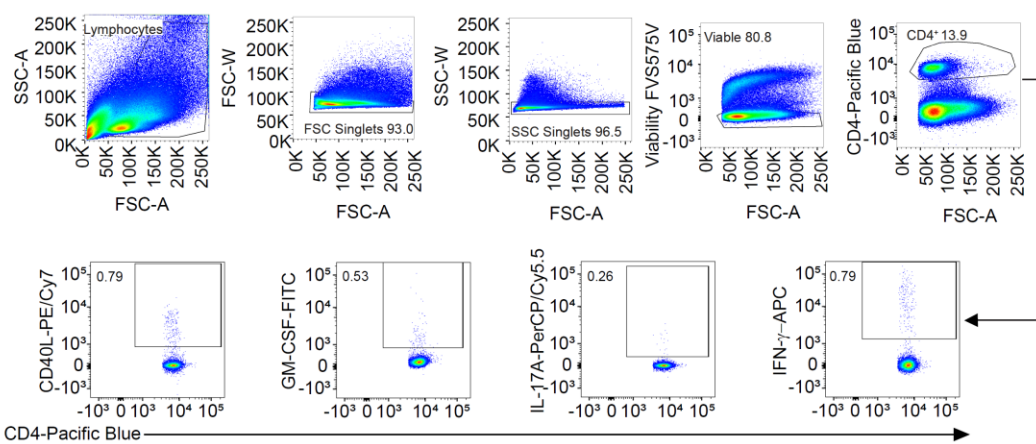

### **Supplementary Figure 7: Gating strategy**

(A) Gating strategy to analyse expression of surface markers on Foxp3<sup>+</sup>Thy1.1<sup>+</sup> and Foxp3<sup>+</sup>Thy1.1<sup>-</sup> cells in LNs. Representative gating of LNs cells 3 days post infection (p.i.). Related to Fig. 1 and Fig. S1.

(B) Gating strategy to analyse the number, percentage, and expression of surface markers on Foxp3<sup>+</sup>Thy1.1<sup>+</sup> and Foxp3<sup>+</sup>Thy1.1<sup>-</sup> cells in blood 9 days p.i. Related to Fig. 2C and E, Fig. 4C, Fig. 5B and Fig. S6C.

(C) Gating strategy to analyse the number, percentage, and expression of surface markers on Foxp3<sup>+</sup>Thy1.1<sup>+</sup> and Foxp3<sup>+</sup>Thy1.1<sup>-</sup> cells in spleens 35 days p.i. Related to Fig. 2D, Fig. 4D, Fig. 5C-D and Fig. S2B.

(D) Gating strategy to analyse the expression of CD40L, GM-CSF, IL-17A, and IFN- $\gamma$  after restimulation with MOG(35-55) on CD4<sup>+</sup> cells in blood 9 days p.i. Related to Fig. 2B and Fig. 4B.

(E) Gating strategy to analyse the expression of CD40L, GM-CSF, IL-17A, and IFN- $\gamma$  after restimulation with MOG(35-55) on CD4<sup>+</sup> cells in spleens 35 days p.i. Related to Fig. S2A.
